## 1 Initial evaluation of a mobile SARS-CoV-2 RT-LAMP testing strategy

2 Christina M. Newman<sup>1\*</sup>, Mitchell D. Ramuta<sup>1\*</sup>, Matthew T. McLaughlin<sup>1</sup>, Roger W. Wiseman<sup>1</sup>, Julie A.  
3 Karl<sup>1</sup>, Dawn M. Dudley<sup>1</sup>, Miranda R. Stauss<sup>3</sup>, Robert J. Maddox<sup>3</sup>, Andrea M. Weiler<sup>3</sup>, Mason I. Bliss<sup>2</sup>,  
4 Katrina N. Fauser<sup>3</sup>, Luis A. Haddock III<sup>2</sup>, Cecilia G. Shortreed<sup>1</sup>, Amelia K. Haj<sup>1</sup>, Molly A. Accola<sup>4</sup>, Anna  
5 S. Heffron<sup>1</sup>, Hailey E. Bussan<sup>1</sup>, Matthew R. Reynolds<sup>2,3</sup>, Olivia E. Harwood<sup>1</sup>, Ryan V. Moriarty<sup>1</sup>, Laurel  
6 M. Stewart<sup>1</sup>, Chelsea M. Crooks<sup>2</sup>, Trent M. Prall<sup>1</sup>, Emma K. Neumann<sup>1</sup>, Elizabeth D. Somsen<sup>1</sup>, Corrie  
7 B. Burmeister<sup>1</sup>, Kristi L. Hall<sup>1</sup>, William M. Rehrauer<sup>1,4</sup>, Thomas C. Friedrich<sup>2,3</sup>, Shelby L. O'Connor<sup>1,3</sup>,  
8 David H. O'Connor<sup>1,3</sup>

9 Author Affiliations:

10 Pathology and Laboratory Medicine, School of Medicine and Public Health, University of Wisconsin-  
11 Madison, Madison, WI, USA<sup>1</sup>

12 Pathobiological Sciences, School of Veterinary Medicine, University of Wisconsin-Madison, Madison,  
13 WI, USA<sup>2</sup>

14 Wisconsin National Primate Research Center, Madison, WI, USA<sup>3</sup>

15 University of Wisconsin Hospitals and Clinics, Madison, WI, USA<sup>4</sup>

16 \*These authors contributed equally to this work.

17

18 No. text pages: 26, No. tables and figures: 4 tables, 3 figures, 1 supplemental table

19 Running head: RT-LAMP surveillance for SARS-CoV-2

20 Funding and support: NIH RADx (3 U54 EB027690-0S1), NIH P51 (OD011106 to WNPRC), RFIP  
21 (RR15459-01 and RR020141-01 to WNPRC), WARF COVID-19 Challenge grant, NIH T32 (A|007414  
22 to A.S.H. and C.M.C.)

23 Conflicts of interest: C.M.N., D.M.D, A.M.W., D.H.O., and T.C.F. provided consulting services to Salus  
24 Discovery LLC. D.H.O. is also a consultant for Batelle.

25 Correspondence: David H. O'Connor, 555 Science Dr, Madison, WI 53711 Phone: (608) 890-0845, Fax  
26 (608) 265-8084, Email: [dhoconno@wisc.edu](mailto:dhoconno@wisc.edu)

27

28 **Abstract (220 of 220 words)**

29 Severe acute respiratory syndrome coronavirus 2 (SARS-CoV-2) control in the United States remains  
30 hampered, in part, by testing limitations. We evaluated a simple, outdoor, mobile, colorimetric reverse  
31 transcription loop-mediated isothermal amplification (RT-LAMP) assay workflow where self-collected  
32 saliva is tested for SARS-CoV-2 RNA. From July 16 to November 19, 2020, 4,704 surveillance samples  
33 were collected from volunteers and tested for SARS-CoV-2 at 5 sites. A total of 21 samples tested  
34 positive for SARS-CoV-2 by RT-LAMP; 12 were confirmed positive by subsequent quantitative reverse-  
35 transcription polymerase chain reaction (qRT-PCR) testing, while 8 were negative for SARS-CoV-2  
36 RNA, and 1 could not be confirmed because the donor did not consent to further molecular testing. We  
37 estimated the RT-LAMP assay's false-negative rate from July 16 to September 17, 2020 by pooling  
38 residual heat-inactivated saliva that was unambiguously negative by RT-LAMP into groups of 6 or less  
39 and testing for SARS-CoV-2 RNA by qRT-PCR. We observed a 98.8% concordance between the RT-  
40 LAMP and qRT-PCR assays, with only 5 of 421 RT-LAMP negative pools (2,493 samples) testing  
41 positive in the more sensitive qRT-PCR assay. Overall, we demonstrate a rapid testing method that can  
42 be implemented outside the traditional laboratory setting by individuals with basic molecular biology  
43 skills and can effectively identify asymptomatic individuals who would not typically meet the criteria for  
44 symptom-based testing modalities.

45

46

47

48

49

50

51

52

53

54

## 55 Introduction

56 More than 340,000,000 severe acute respiratory syndrome coronavirus 2 (SARS-CoV-2) diagnostic  
57 tests have been performed in the United States as of February 22, 2021, yet it is estimated that 80-95%  
58 of infected individuals are not tested<sup>1,2</sup>. The availability of diagnostic testing for population surveillance  
59 around the United States has been limited because of testing supply shortages and guidelines set by  
60 public health officials<sup>3, 4</sup>. Multiple studies have shown that asymptomatic and presymptomatic  
61 individuals infected with SARS-CoV-2 can be as infectious as symptomatic individuals<sup>5-9</sup>, with recent  
62 estimates of up to 59% of transmission coming from asymptomatic or presymptomatic individuals<sup>10</sup>.  
63 Virological assessments of SARS-CoV-2-positive individuals and coronavirus disease 2019 (COVID-  
64 19) patients further support the reports of asymptomatic transmission, identifying no significant  
65 differences in viral loads found in the upper respiratory tracts of asymptomatic and symptomatic  
66 individuals<sup>5, 7, 11-13</sup>. Furthermore, Arons et al. (2020) demonstrated that positive viral cultures can be  
67 isolated from presymptomatic patients up to 6 days before the onset of symptoms<sup>5</sup>.

68

69 Delays in reporting test results can prevent timely isolation of infected individuals. Most current testing  
70 programs fail to identify and efficiently notify infected individuals. Since transmission can occur before  
71 symptoms manifest, reporting delays create a major barrier to safely returning to workplaces and  
72 schools<sup>14</sup>. Therefore, there remains an urgent need for rapid tests that identify presymptomatic and  
73 asymptomatic individuals while conserving diagnostic testing reagents. Non-diagnostic point-of-care  
74 (POC) testing, used in conjunction with the current clinical diagnostic testing regimen, may improve our  
75 ability to identify infectious individuals and limit their exposure to others while they are most contagious  
76 and conserve clinical diagnostic tests for those who require confirmatory testing. Incorporating active  
77 surveillance using POC tests as part of mitigation strategies for reopening K-12 schools could play an  
78 integral role in reducing SARS-CoV-2 transmission among students, teachers and staff members,  
79 families, and the surrounding community<sup>15, 16</sup>.

80

81 Loop-mediated isothermal amplification (LAMP) is a low-cost method for rapid target-specific detection

82 of nucleic acids<sup>17</sup>. LAMP has long been used as an alternative to gold-standard quantitative reverse  
83 transcription polymerase chain reaction (qRT-PCR) to surveil populations for a variety of pathogens,  
84 especially in resource-limited settings<sup>18–22</sup>. Reverse transcription LAMP (RT-LAMP) assays have  
85 recently been developed for rapid SARS-CoV-2 testing<sup>23–29</sup>. RT-LAMP is an appealing candidate for  
86 POC SARS-CoV-2 testing because it is inexpensive, circumvents supply shortages by relying on  
87 different reagents than current diagnostic tests, requires minimal sample processing, and can be  
88 deployed outside of traditional laboratory settings. Recently, a number of studies have shown the  
89 correlation between the presence of virus in saliva and nasopharyngeal swabs, demonstrating that  
90 saliva specimens are a valid and reliable alternative to nasopharyngeal swab specimens for SARS-  
91 CoV-2 testing<sup>30–35</sup>. Saliva specimen self-collection is noninvasive, can be done at home, does not  
92 require swabs or personal protective equipment, and limits direct contact between test operators and  
93 testing populations. Here we describe our experience implementing a simple, rapid-turnaround, mobile,  
94 non-diagnostic SARS-CoV-2 testing workflow combining self-collected saliva and RT-LAMP in  
95 volunteers without symptoms of SARS-CoV-2 infection. Individuals were strongly encouraged to isolate  
96 and obtain follow-up diagnostic testing after receiving a positive result by RT-LAMP. This addresses a  
97 key knowledge gap of how on-site RT-LAMP testing performs in real-world conditions, since virtually all  
98 previous studies have only evaluated SARS-CoV-2 RT-LAMP in well-equipped molecular biology  
99 laboratories.

100

## 101 **Materials and Methods**

### 102 POC testing sites

103 To begin operating voluntary POC testing, we developed a system of color-coded storage bins for  
104 equipment and supplies, as well as assembled folding tables, chairs, extension cords, and coolers that  
105 could be easily decontaminated and packed to fit in a Dodge Caravan (FCA US LLC., Auburn Hills, MI)  
106 or other, similarly sized minivan for transportation between testing sites and our base laboratory facility.  
107 On July 16, 2020, we launched our first mobile POC testing sites which ultimately expanded over 18  
108 weeks to include two workplaces, two K-12 schools, and an athletics program (Suppl. Table 1). With

109 the exception of the athletics program, sites were initially outdoors, sometimes under an overhang, but  
110 otherwise open to the environment. The athletics site was a climate-controlled, indoor practice field. At  
111 all sites, equipment and reagents were transported by minivan and surfaces were disinfected during  
112 assembly, breakdown, and frequently throughout testing. Participant consenting and volunteer sample  
113 collection were performed on-site but separated from the sample preparation and assay areas (most  
114 commonly on the other side of the building). In an effort to limit contamination, each assay area was set  
115 up with three separate folding tables: (1) sample heat-inactivation and preparation, (2) preparation of  
116 RT-LAMP reagents and assay set-up, and (3) RT-LAMP incubation and imaging. Individuals  
117 responsible for sample inactivation and performing assays wore appropriate personal protective  
118 equipment (PPE) including N95 face masks, face shields or safety glasses, disposable lab coats, and  
119 double gloves. In anticipation of wet and cold fall weather, by September 2020, assay workspaces were  
120 transitioned to biosafety hoods in a vacant indoor laboratory space for several POC testing locations. In  
121 October 2020, we received IRB approval for obtaining consent for repeat SARS-CoV-2 testing. This  
122 allowed us to transition away from consenting participants at each testing time point and instead  
123 allowed each enrolled participant to consent once regardless of the number of times they supplied a  
124 sample. Following reports that SARS-CoV-2 RNA is stable in saliva at room temperature for prolonged  
125 periods<sup>36</sup>, we also transitioned away from in-person sample collection at some of the testing sites and  
126 instead distributed self-collection take-home kits for drop off at designated locations for same day  
127 processing.

128

### 129 Sample collection and preparation

130 We obtained approval from the University of Wisconsin-Madison Institutional Review Board (#2020-  
131 0855 and #2020-1142). Participants were advised to avoid eating, or drinking anything except for water,  
132 for 30 minutes prior to providing a sample. After providing informed consent, volunteers self-collected at  
133 least 50  $\mu$ l of saliva in a 1.5 ml “safe-lock” microcentrifuge tube using a 1000  $\mu$ l unfiltered pipette tip to  
134 funnel the specimen into the tube. Each volunteer disinfected the outside of the tube with a pre-  
135 moistened disinfectant wipe. Samples collected in-person were typically processed within 3 hours of

136 collection through our RT-LAMP mobile testing workflow, while samples collected using take-home kits  
137 were typically processed within 30 hours (Figure 1). Samples were first incubated in a heat block at  
138 65°C for 30 minutes to inactivate SARS-CoV-2<sup>37</sup> and then incubated in another preset heat block at  
139 98°C for 3 minutes to improve nucleic acid detection and inactivate salivary enzymes<sup>38</sup>. The inactivated  
140 saliva was then centrifuged for 2 minutes in a benchtop microcentrifuge. Fifty microliters of the saliva  
141 supernatant were then added to 50 µl of 1x phosphate buffered saline, pH 7.4 (1x PBS).

142

#### 143 RT-LAMP reactions

144 Three microliters of the saliva/PBS mixture for each sample was added in duplicate to 17 µl of a  
145 colorimetric RT-LAMP reaction mix containing WarmStart colorimetric LAMP mastermix (NEB,  
146 catalogue# M1800), water, and a set of six SARS-CoV-2-specific RT-LAMP primers designed against  
147 the N gene<sup>38</sup>. The SARS-CoV-2 RT-LAMP primer set was previously designed by Broughton et al. and  
148 is currently used in an FDA emergency use authorized (EUA) COVID-19 test by Color Genomics (Table  
149 1)<sup>39, 40</sup>. Reactions were incubated for 30 minutes at 65°C. A smartphone or tablet was used to record  
150 images of each reaction before (time = 0) and after the incubation period (time = 30). A color change  
151 from pink/orange to yellow in at least 1 of 2 replicates was scored relative to gamma-irradiated SARS-  
152 CoV-2 (irSARS-CoV-2, BEI Resources, Manassas, VA) that was directly added to RT-LAMP reactions  
153 as a positive control in each batch of reactions at concentrations ranging from 220-3,333 copies/µl  
154 ( $2.2 \times 10^5$  -  $3.33 \times 10^6$  copies/ml). irSARS-CoV-2 was diluted and aliquoted as ready-to-run positive  
155 control standards and stored at -80°C. On the day of testing, the positive controls were removed from  
156 the freezer and stored on ice at POC sites. Individuals whose samples were recorded as potentially  
157 positive for SARS-CoV-2 by RT-LAMP were contacted by an infectious disease clinician in accordance  
158 with the IRB protocol and urged to obtain a clinical diagnostic test to confirm findings and self-isolate in  
159 accordance with public health recommendations.

160

#### 161 Limit of detection (LOD) estimation using contrived saliva samples

162 To estimate the limit of detection of the RT-LAMP assay, contrived positive saliva samples were

163 prepared by adding irSARS-CoV-2 diluted from  $1 \times 10^4$ - $10$  copies/ $\mu$ l ( $1 \times 10^7$ - $1 \times 10^4$ copies/ml) or from  
164  $5 \times 10^4$ - $50$  copies/ $\mu$ l ( $5 \times 10^7$ - $5 \times 10^4$  copies/ml) directly into unaltered saliva collected from a total of 25  
165 SARS-CoV-2-negative individuals. Dilutions were based on two independent, in-house qRT-PCR  
166 experiments showing that the ir-SARS-CoV-2 stock concentration ranged from  $7.89 \times 10^6$  -  $8.23 \times 10^6$   
167 copies/ $\mu$ l ( $7.89 \times 10^9$  -  $8.23 \times 10^9$  copies/ml). In two RT-LAMP experiments, four serial dilutions of irSARS-  
168 CoV-2 were prepared for each saliva sample in duplicate. RT-LAMP reactions were set up as described  
169 previously. Negative controls consisting of 1x PBS and positive controls consisting of  $1 \times 10^4$  copies/ $\mu$ l  
170 ( $1 \times 10^7$  copies/ml) irSARS-CoV-2 in water were also prepared in duplicate. Reactions were called  
171 positive if a color change from pre-amplification to post-amplification occurred in at least 1 of 2  
172 replicates that was consistent with that of the positive controls.

173

174 Limit of detection (LOD) estimation using clinical samples

175 De-identified discard saliva samples from 38 SARS-CoV-2-positive patients were provided by the  
176 University of Wisconsin Hospitals and Clinics (UWHC) for evaluation of RT-LAMP performance with  
177 known positive saliva samples. Clinical saliva samples were originally collected and stored at 4°C for up  
178 to 4 weeks prior to assessment by RT-LAMP. Additional 10-fold and 100-fold dilutions were prepared  
179 for 13 of the samples in saliva collected from a negative volunteer. Clinical samples and dilutions were  
180 prepared as described previously except that 20-50  $\mu$ l of heat-inactivated sample, dependent on total  
181 sample volume, was added to an equal volume of 1x PBS in a clean 1.5 ml screw-top tube and pipetted  
182 gently to mix. For each sample, 3  $\mu$ l was then added to duplicate colorimetric RT-LAMP reactions.  
183 Negative and positive control reactions (described previously) were also prepared in duplicate except  
184 that saliva collected from a negative volunteer was used as the negative control for these reactions.  
185 RT-LAMP reactions were prepared and images collected as described previously.

186

187 Quantitative RT-PCR

188 POC samples

189 We measured vRNA concentration using sensitive qRT-PCR in a subset of the inactivated saliva  
190 samples described above after initial evaluation using RT-LAMP. Saliva samples that were negative for  
191 SARS-CoV-2 by RT-LAMP were pooled into groups of 6 or fewer for qRT-PCR to balance cost  
192 effectiveness with reasonable estimated detection sensitivity. Ten additional, individual RT-LAMP-  
193 negative samples were submitted as negative controls alongside samples identified as positive by RT-  
194 LAMP. Saliva samples that were identified as positive for SARS-CoV-2 by RT-LAMP were tested by  
195 qRT-PCR individually to estimate our POC LOD. RNA was isolated from up to 150  $\mu$ l saliva and  
196 combined with an equivalent volume of nuclease-free water using the Viral Total Nucleic Acid kit for the  
197 Maxwell RSC instrument (Promega, Madison, WI) following the manufacturer's instructions. Viral load  
198 quantification was performed using a sensitive qRT-PCR assay developed by the CDC to detect SARS-  
199 CoV-2 (specifically the N1 assay) and commercially available from IDT (Coralville, IA). The assay was  
200 run on a LightCycler 96 or LC480 instrument (Roche, Indianapolis, IN) using the Taqman Fast Virus 1-  
201 step Master Mix enzyme (Thermo Fisher, Waltham, MA). The limit of detection of this assay is  
202 estimated to be 0.2 genome equivalents/ $\mu$ l (200 genome equivalents/ml) saliva. To determine the  
203 vRNA load, samples were interpolated onto a standard curve consisting of serial 10-fold dilutions of *in*  
204 *vitro* transcribed SARS-CoV-2 N gene RNA kindly provided by Nathan Grubaugh (Yale University) and  
205 described by Dudley et al.<sup>35</sup>.

206

207 Clinical samples

208 qRT-PCR was performed using the conditions described above for each of the 38 SARS-CoV-2  
209 positive saliva samples individually; however, sample volume limitations required that for some  
210 samples, only 100  $\mu$ l saliva was combined with 100  $\mu$ l of nuclease-free water prior to RNA isolation. In  
211 addition, sample UWHC3 contained a lower volume than the remaining 37 samples so 50  $\mu$ l saliva was  
212 combined with 50  $\mu$ l nuclease-free water and used for RNA isolation as described previously. Viral  
213 loads in copies per microliter and corresponding cycle threshold numbers (Ct) are reported in Table 2.

214

215 **Results**



216 LOD estimation using contrived saliva samples

217 We assessed the LOD for minimally processed saliva samples collected from 25 volunteers over two  
218 RT-LAMP experiments using irSARS-CoV-2 spiked into negative saliva samples (Figure 2A and 2B). In  
219 our first experiment (S1-S3), we detected irSARS-CoV-2 in at least 1 of 2 replicates at  $1 \times 10^2$  copies/ $\mu$ l  
220 ( $1 \times 10^5$  copies/ml) in all 3 samples (Figure 2A). In our second experiment (S4-S25), we detected  
221 irSARS-CoV-2 by RT-LAMP in 2/2 replicates at  $5 \times 10^4$  copies/ $\mu$ l ( $5 \times 10^7$  copies/ml) for 95% of samples,  
222 at  $5 \times 10^3$  copies/ $\mu$ l ( $5 \times 10^6$  copies/ml) for 62% of samples, and at 500 copies/ $\mu$ l ( $5 \times 10^5$  copies/ml) for 10%  
223 of samples. When we included samples called positive in at least 1 of 2 replicates (see Methods), the  
224 percentage of contrived samples positive by RT-LAMP at each of the aforementioned dilutions were  
225 100%, 90%, and 33.3% respectively (Figure 2B). One sample was omitted from the analysis because it  
226 turned yellow before the RT-LAMP reaction incubation began and was therefore uninterpretable.  
227 Because in POC testing we defined a positive RT-LAMP result as an observed post-incubation color  
228 change to yellow in at least 1 replicate, these results suggested that our 90% LOD is between  $1 \times 10^2$   
229 and  $5 \times 10^3$  copies/ $\mu$ l ( $1 \times 10^5$  -  $5 \times 10^6$  copies/ml).

230

231 LOD estimation using clinical samples

232 To assess the performance of SARS-CoV-2 RT-LAMP in known SARS-CoV-2 positive saliva samples  
233 as opposed to contrived positive samples, we acquired deidentified, discarded saliva samples collected  
234 from 38 patients with laboratory confirmed SARS-CoV-2 from UWHC. Nineteen of 38 undiluted saliva  
235 samples were positive for SARS-CoV-2 in 2/2 replicates by RT-LAMP (Figure 3; Table 2). Two  
236 additional samples were positive in 1 of 2 replicates. Quantitative RT-PCR data showed that the viral  
237 RNA (vRNA) loads of the positive samples ranged from 131 copies/ $\mu$ l to  $5.7 \times 10^4$  copies/ $\mu$ l ( $1.31 \times 10^5$ -  
238  $5.71 \times 10^7$  copies/ml) which was consistent with our LOD range for contrived samples (Table 3).  
239 Furthermore, for the 13 samples diluted 10-fold and 100-fold, detection decreased with increasing  
240 dilution factor (Table 4).

241

242 POC SARS-CoV-2 RT-LAMP testing

243 From July 16 to November 19, 2020, SARS-CoV-2 RT-LAMP was used to test a total of 4,704 samples  
244 collected from 5 locations. Participants were enrolled into the study regardless of their SARS-CoV-2  
245 symptom status on the day of testing. Seventy-one percent of the samples were obtained from  
246 individuals at two research facilities, 11% from two K-12 schools, and 18% from an athletics program  
247 (Supplemental Table 1). A total of 21 samples were identified as positive for SARS-CoV-2 by RT-LAMP  
248 based on a colorimetric change from pink/orange to yellow in at least 1 of 2 sample replicates. Similar  
249 to our experience with our contrived LOD samples, about 0.40% (19/4,704) of samples collected during  
250 POC testing exhibited a color change to yellow prior to RT-LAMP assay amplification and were  
251 therefore uninterpretable. Follow up qRT-PCR testing was conducted on each sample that appeared  
252 positive after the 30 minute amplification reaction throughout the study to determine vRNA load. Twelve  
253 of the 21 samples called positive in RT-LAMP had detectable SARS-CoV-2 RNA by qRT-PCR. Viral  
254 RNA loads of these samples ranged from 8.58 copies/ $\mu$ l to  $3.62 \times 10^5$  copies/ $\mu$ l ( $8.58 \times 10^3$  copies/ml-  
255  $3.62 \times 10^8$  copies/ml) with a median of 504.5 copies/ $\mu$ l ( $5.04 \times 10^5$  copies/ml) (Table 4). Eight of the saliva  
256 samples identified as positive by RT-LAMP were negative by qRT-PCR, suggesting that they were  
257 false-positive RT-LAMP results. One RT-LAMP-positive sample was not tested by qRT-PCR because  
258 the participant did not consent to additional molecular testing. For volunteers who consented to  
259 additional research testing from July 16 to September 17, qRT-PCR testing was conducted for pools of  
260 6 or fewer for all residual, heat-inactivated samples that appeared unambiguously negative by RT-  
261 LAMP. A total of 421 RT-LAMP-negative pools (2,493 samples) were tested to estimate the number of  
262 SARS-CoV-2-positive samples missed by RT-LAMP. Quantitative RT-PCR detected SARS-CoV-2  
263 nucleic acids in 5 pools of RT-LAMP-negative samples. Four out of five of the positive pools contained  
264 levels of SARS-CoV-2 that were below the estimated LOD range for RT-LAMP using crude samples  
265 with vRNA load estimates of 0.236, 0.444, 0.460, 37.5, and 142 copies/ $\mu$ l (236, 444, 460,  $3.75 \times 10^4$ , and  
266  $1.42 \times 10^5$  copies/ml). Taken together, the low prevalence of SARS-CoV-2 in our volunteer testing  
267 population (0.36%, including RT-LAMP-negative, qRT-PCR-positive pools) and the low vRNA load of  
268 pools positive by follow-up qRT-PCR, suggest that these 5 pools likely contained only a single positive  
269 sample each and suggests a false-negative rate of 0.02% (5/2,493) (Table 4).

270

## 271 **Discussion**

272 Strategic surveillance testing of asymptomatic individuals has been suggested as an important  
273 mitigation strategy for places at high risk for close contact, indoor SARS-CoV-2 transmission: schools,  
274 workplaces, places of worship, and prisons, among others. Decentralized, mobile RT-LAMP-based  
275 POC testing workflows can provide same-day results which can enable people with potential SARS-  
276 CoV-2 infections to quickly self-isolate and then obtain confirmatory diagnostic testing. The low per-test  
277 cost (approximately \$7 per sample tested in duplicate) allows for repeated testing to identify incident  
278 infections and reduce the duration of a potentially infected individual's exposure to others. While RT-  
279 LAMP is not as sensitive as diagnostic qRT-PCR tests in laboratory testing, qRT-PCR tests require  
280 centralized labs, which in turn leads to lengthy turnaround times. Over a period of 18 weeks, we  
281 performed 4,704 SARS-CoV-2 tests across 5 sites using a simple, saliva-based, direct RT-LAMP  
282 assay. This work demonstrates the scalability of decentralized, mobile RT-LAMP-based testing and  
283 addresses a key knowledge gap of how POC RT-LAMP testing performs outside of well-equipped  
284 molecular biology laboratories.

285

286 Our initial experiments using direct RT-LAMP with contrived saliva samples from a total of 25 donors  
287 demonstrated a LOD that ranged from  $1 \times 10^2$  copies/ $\mu$ l (100% in at least 1 replicate for S1-S3) to  $5 \times 10^3$   
288 copies/ $\mu$ l (90% in at least one replicate for S4-S25). Taken together, these data suggest that the actual  
289 LOD for RT-LAMP without RNA isolation may be dependent on the individual sample due to  
290 heterogeneity of saliva pH and composition<sup>41-43</sup>. Overall, the RT-LAMP results for 38 clinical saliva  
291 samples obtained from SARS-CoV-2-positive individuals at the UWHC, were consistent with those for  
292 the contrived samples. We recognize that more clinical samples are required for a comprehensive  
293 clinical validation, but the LOD observed in clinical samples is further supported by the low vRNA loads  
294 obtained from qRT-PCR-confirmed SARS-CoV-2-positive samples identified in our volunteer population  
295 (Table 4). The performance of our RT-LAMP POC testing workflow demonstrates that inexpensive,  
296 mobile testing can be successfully performed outdoors or in other non-traditional laboratory settings to

297 identify SARS-CoV-2-positive individuals regardless of whether or not symptoms are present. Our  
298 observed SARS-CoV-2 RT-LAMP positivity rate was 0.25% (12/4,704) for samples confirmed by follow-  
299 up qRT-PCR. Interestingly, the positivity rate of 0.25% in our volunteer population was lower than  
300 expected given the disease activity in our region during this period of time was listed as “critically high”,  
301 particularly between September 1 and November 19, 2020 when the county had a 5.42% positivity rate  
302 (19,031 positive tests out of 350,722) <sup>44, 45</sup>. The low positivity rate in our volunteer population may be  
303 partly explained by the fact that 71% of tested saliva specimens came from two research facilities  
304 where mask wearing and physical distancing guidelines were implemented early in the pandemic and  
305 followed relatively stringently (Supplemental Table 1). Volunteers for nonsymptomatic research testing  
306 might also have a different risk profile from the overall population.

307

308 Potential drawbacks of colorimetric RT-LAMP-based surveillance for SARS-CoV-2 as described here  
309 include the fact that minimally-processed saliva can result in variable reaction color change without the  
310 presence of the target RNA. However, modifications of RT-LAMP-based SARS-CoV-2 assays to  
311 reduce saliva sample variability, improve result ambiguity, and increase throughput have recently been  
312 reported elsewhere and may improve the implementation of RT-LAMP-based assays for POC use <sup>46-50</sup>.  
313 In addition, we relied on a manual RT-LAMP format during POC testing. Reading assays “by eye”  
314 inevitably results in a somewhat subjective determination of positives. Reducing false-positive results in  
315 our POC volunteer populations required consistent use of duplicate reactions for each individual, which  
316 reduced assay throughput and increased the per-sample cost. Furthermore, the testing landscape  
317 changed dramatically during the months we performed RT-LAMP testing. The first non-instrumented  
318 antigen test, the Abbott BinaxNOW COVID-19 Ag CARD, received FDA EUA approval in the United  
319 States on August 26, 2020 <sup>51</sup>. While the sensitivity of RT-LAMP is broadly comparable to the Abbott  
320 BinaxNOW antigen test (reported as  $1.6 \times 10^4$  -  $4.3 \times 10^4$  vRNA copies; Ct 30.3-28.8), because the former  
321 is technically straightforward and can be used as a SARS-CoV-2 diagnostic at testing sites operating  
322 under a Clinical Laboratory Improvement Amendments (CLIA) waiver, it is likely a better choice for  
323 rapid turnaround, on-site testing in most circumstances <sup>52</sup>. However, even with the existence of antigen

324 tests, RT-LAMP surveillance programs still have a place as part of a comprehensive SARS-CoV-2 risk  
325 mitigation strategy, especially in areas where access to antigen tests is limited.

326

327 There are advantages to continuing saliva-based RT-LAMP surveillance testing. Importantly, the supply  
328 of diagnostic antigen tests remains tightly constrained, and in the United States, these tests are  
329 available only through government contracts. Widespread testing of individuals without symptoms with  
330 such a scarce resource may not be a wise use of these limited tests. Furthermore, recent studies have  
331 shown that antigen test performance may differ between asymptomatic and symptomatic populations.  
332 Compared to qRT-PCR, the sensitivity of FDA-approved antigen tests, BinaxNOW and the Quidel Sofia  
333 SARS Antigen Fluorescent Immunoassay, were 35% and 41% in asymptomatic individuals and 64%  
334 and 80% in symptomatic individuals, respectively<sup>53, 54</sup>. BinaxNOW is currently only approved for use in  
335 symptomatic individuals, within 7 days of symptom onset, and samples are required to be tested within  
336 an hour of collection<sup>55</sup>. In contrast, RT-LAMP reagents do not require a government contract and can  
337 be acquired readily from commercial and non-commercial sources, and they can also be used more  
338 flexibly for surveillance purposes because RT-LAMP is not limited to use in symptomatic individuals<sup>56</sup>.  
339 Additionally, user acceptance of testing may also favor saliva-based RT-LAMP as it is less invasive  
340 than nasal swab-based tests. While an individual BinaxNOW test is rapid, performing several tests  
341 during a single day could cumulatively take as long as processing a batch of tests by RT-LAMP. For  
342 these reasons, RT-LAMP may still be the preferred testing method to incorporate into a local program.  
343 In Madison, WI, two local schools have implemented RT-LAMP surveillance programs modeled on the  
344 program described here. Implementation of each program required approximately 50 hours of hands-on  
345 training by our group. School staff were trained in adherence to regulations pertaining to non-diagnostic  
346 testing and to competently perform RT-LAMP assays. Each school also needed time and resources to  
347 acquire the modest lab infrastructure necessary to perform RT-LAMP. In addition, a larger saliva-based  
348 RT-LAMP surveillance program has been successfully implemented in school districts in the greater  
349 Chicago suburbs<sup>57, 58</sup>.

350

351 A looming question for both RT-LAMP and antigen testing programs is whether the real-world  
352 effectiveness of frequently testing individuals without symptoms mirrors the theoretical benefits. Several  
353 important considerations that we factored into the design of RT-LAMP testing remain true:  
354 nonsymptomatic individuals account for up to 59% of all transmission (24% asymptomatic and 35%  
355 presymptomatic); low-sensitivity tests are able to effectively identify those with high levels of virus  
356 shedding, and individuals with high viral loads are likely to be responsible for a significant fraction of  
357 onward community transmission; and the duration of peak infectiousness is short, so lengthy lags in  
358 reporting test results could miss a critical window of high transmissibility<sup>10, 59</sup>. Conversely, high-quality,  
359 exceptionally well-resourced testing programs such as those at the White House and among  
360 intercollegiate athletic programs have failed to stop outbreaks<sup>60</sup>. The latter deserves special note:  
361 outbreaks in these programs occurred in spite of 100% adherence to daily testing. Data from daily  
362 sampling of individuals with incident SARS-CoV-2 infection suggests that the mean duration of time  
363 from infection to peak viral shedding is approximately three days, but some individuals potentially reach  
364 peak viral shedding in under one day<sup>61</sup>. The potential for an extremely rapid increase in viral load,  
365 which likely parallels shedding of infectious virus, means that in some cases, even daily testing might  
366 be insufficient to protect a community from someone who is newly infected.

367

368 Perhaps more importantly, the benefit of frequent testing of individuals without symptoms with RT-  
369 LAMP or other assays may be substantially undermined by risk disinhibition. When people are tested  
370 frequently, they may both underestimate their own risk of becoming infected in the interval between  
371 tests and overestimate the possibility that their similarly tested contacts are uninfected; anecdotal  
372 evidence of this phenomenon is perhaps most vividly seen in the September 26, 2020 White House  
373 Rose Garden reception for Justice Amy Coney Barrett, in which many attendees were photographed  
374 not wearing masks nor following guidelines for physical distancing<sup>62</sup>. If infections among people without  
375 symptoms are rare (~0.4% of tests in this study, when combining RT-LAMP and pooled qRT-PCR  
376 positives), but 10% of the tested population views testing as license for increased risk-taking, is  
377 frequent testing of symptomless people a net positive? Appropriate messaging to the community is

378 essential with any testing program to ensure the population understands the meaning of a test result.  
379 Such issues will require an optimization of messaging to mitigate the impact of risk disinhibition to the  
380 extent possible.

381  
382 Ultimately, this study provides proof of concept and guidance for how decentralized rapid testing could  
383 be implemented in a mobile testing scenario, which may be especially useful in resource-limited  
384 settings. Despite the caveats presented above, we identified 12 SARS-CoV-2-positive individuals and  
385 likely prevented onward transmission from those individuals who otherwise would not know they were  
386 positive. Rapid tests, although less sensitive than qRT-PCR, have shorter turnaround times and could  
387 bridge the gap between SARS-CoV-2 surveillance and diagnostic testing. POC testing can be effective  
388 for identifying asymptomatic individuals but must be used in conjunction with appropriate messaging  
389 and other mitigation strategies to effectively reduce SARS-CoV-2 transmission.

390

### 391 **Acknowledgments**

392 This work was made possible by financial support through NIH Rapid Acceleration of Diagnostics (3  
393 U54 EB027690-02S1). Additional funding was provided in part by the office of the director, National  
394 Institutes of Health, under award number P51OD011106 to the Wisconsin National Primate Research  
395 Center (WNPRC), University of Wisconsin-Madison. This research was conducted in part at a facility  
396 constructed with support from Research Facilities Improvement Program grant numbers RR15459-01  
397 and RR020141-01. The content is solely the responsibility of the authors and does not necessarily  
398 represent the official views of the National Institutes of Health. Additional funding was provided by the  
399 Wisconsin Alumni Research Foundation (WARF) COVID-19 Challenge. A.S.H. and C.M.C. have been  
400 supported by the National Institutes of Health National Research Service Award T32 AI007414. We are  
401 grateful for the assistance of both the University of Wisconsin Institutional Biosafety Committee and the  
402 Health Sciences Institutional Review Board at University of Wisconsin-Madison. We also acknowledge  
403 Christopher E. Mason, PhD Cornell-Weill Medical School and Alison Kriegel, PhD Medical College of  
404 Wisconsin as well as public employees from Racine, WI in their partnership to this project. We would

405 like to thank Abigail Johnson, Abby Weaver, Abdel Daoud, Allison Eierman, Ben Boerigter, Clarissa  
406 Tjoanda, Julia Pulokas, Julie Chen, Ryan Anderson, Will Vuyk, Jenny Lee, Max Bobholz, Sam  
407 Havlicek, Hunter Ries, Nicole Minerva, Emma Boehm, Elizabeth Brown, and Jayden Lee for their help  
408 preparing and organizing supplies for POC testing. David Beebe, Nate Grubaugh, and Kristian  
409 Andersen provided useful technical discussions. We thank Eli O'Connor for assistance with POC label  
410 generation and template preparation. We are grateful to the study volunteers and organizations that  
411 allowed us to evaluate this mobile testing strategy.

412

### 413 **Author Contributions**

414 CMN, MDR, RWW, DMD, CGS, DHO, SLO contributed to assay development and optimization. DMD,  
415 MTM, RWW, CMN, MRS, AMW, MIB, KNF, MDR, LAH, OEH, RVM, CMC, SLO, MRR, TCF, TMP,  
416 EDS, LMS, EKN contributed to point of care testing and PCR confirmation. CMN, MDR, DMD, DHO  
417 contributed to data analysis, interpretation, and writing. JAK, DHO, SLO, HEB, TCF, MTM, AKH, LAH,  
418 CMC, KLH, CBB, KNF contributed to logistics and organization of point of care testing. CBB, KLH  
419 contributed to obtaining IRB and worked closely with the institutional biosafety committee on other  
420 regulatory responsibilities. MAA, ASH, WMR contributed to providing residual SARS-CoV-2 positive  
421 saliva samples and sample information from the University of Wisconsin Hospitals and Clinics. All  
422 authors contributed to editing the manuscript.

423

### 424 **Regulatory oversight**

425 This work was performed under approved UW-Madison Health Sciences IRB #2020-0855 and #2020-  
426 1142.

427

428

429



430

431

432

433

434

435 **References**

- 436 1. Silverman JD, Hupert N, Washburne AD. Using influenza surveillance networks to estimate state-  
437 specific prevalence of SARS-CoV-2 in the United States. *Sci Transl Med* 2020,  
438 1210.1126/scitranslmed.abc1126
- 439 2. Havers FP, Reed C, Lim T, Montgomery JM, Klena JD, Hall AJ, Fry AM, Cannon DL, Chiang CF,  
440 Gibbons A, Krapivunaya I, Morales-Betoulle M, Roguski K, Rasheed MAU, Freeman B, Lester S,  
441 Mills L, Carroll DS, Owen SM, Johnson JA, Semenova V, Blackmore C, Blog D, Chai SJ, Dunn A,  
442 Hand J, Jain S, Lindquist S, Lynfield R, Pritchard S, Sokol T, Sosa L, Turabelidze G, Watkins SM,  
443 Wiesman J, Williams RW, Yendell S, Schiffer J, Thornburg NJ. Seroprevalence of Antibodies to  
444 SARS-CoV-2 in 10 Sites in the United States, March 23-May 12, 2020. *JAMA Intern Med* 2020,  
445 10.1001/jamainternmed.2020.4130
- 446 3. Esbin MN, Whitney ON, Chong S, Maurer A, Darzacq X, Tjian R. Overcoming the bottleneck to  
447 widespread testing: a rapid review of nucleic acid testing approaches for COVID-19 detection.  
448 *RNA* 2020, 26:771-783. 10.1261/rna.076232.120
- 449 4. Schuetz AN, Hemarajata P, Mehta N, Campbell S, Mitchell S, Palavecino E, Butler-Wu S, Miller  
450 MB. When Should Asymptomatic Persons Be Tested for COVID-19. *J Clin Microbiol* 2020,  
451 5910.1128/JCM.02563-20
- 452 5. Arons MM, Hatfield KM, Reddy SC, Kimball A, James A, Jacobs JR, Taylor J, Spicer K, Bardossy  
453 AC, Oakley LP, Tanwar S, Dyal JW, Harney J, Chisty Z, Bell JM, Methner M, Paul P, Carlson CM,  
454 McLaughlin HP, Thornburg N, Tong S, Tamin A, Tao Y, Uehara A, Harcourt J, Clark S, Brostrom-

- 455 Smith C, Page LC, Kay M, Lewis J, Montgomery P, Stone ND, Clark TA, Honein MA, Duchin JS,  
456 Jernigan JA. Presymptomatic SARS-CoV-2 Infections and Transmission in a Skilled Nursing  
457 Facility. *N Engl J Med* 2020, 382:2081-2090. 10.1056/NEJMoa2008457
- 458 6. Bai Y, Yao L, Wei T, Tian F, Jin DY, Chen L, Wang M. Presumed Asymptomatic Carrier  
459 Transmission of COVID-19. *JAMA* 2020, 323:1406-1407. 10.1001/jama.2020.2565
- 460 7. Rothe C, Schunk M, Sothmann P, Bretzel G, Froeschl G, Wallrauch C, Zimmer T, Thiel V, Janke  
461 C, Guggemos W, Seilmaier M, Drosten C, Vollmar P, Zwirgmaier K, Zange S, Wölfel R,  
462 Hoelscher M. Transmission of 2019-nCoV Infection from an Asymptomatic Contact in Germany. *N*  
463 *Engl J Med* 2020, 382:970-971. 10.1056/NEJMc2001468
- 464 8. Quicke K, Gallichote E, Sexton N, Young M, Janich A, Gahm G, Carlton EJ, Ehrhart N, Ebel GD.  
465 Longitudinal Surveillance for SARS-CoV-2 RNA Among Asymptomatic Staff in Five Colorado  
466 Skilled Nursing Facilities: Epidemiologic, Virologic and Sequence Analysis. *medRxiv* 2020,  
467 10.1101/2020.06.08.20125989
- 468 9. Furukawa NW, Brooks JT, Sobel J. Evidence Supporting Transmission of Severe Acute  
469 Respiratory Syndrome Coronavirus 2 While Presymptomatic or Asymptomatic. *Emerg Infect Dis*  
470 2020, 26:10.3201/eid2607.201595
- 471 10. Johansson MA, Quandelacy TM, Kada S, Prasad PV, Steele M, Brooks JT, Slayton RB,  
472 Biggerstaff M, Butler JC. SARS-CoV-2 Transmission From People Without COVID-19 Symptoms.  
473 *JAMA Netw Open* 2021, 4:e2035057. 10.1001/jamanetworkopen.2020.35057
- 474 11. Lavezzo E, Franchin E, Ciavarella C, Cuomo-Dannenburg G, Barzon L, Del Vecchio C, Rossi L,  
475 Manganelli R, Loregian A, Navarin N, Abate D, Sciro M, Merigliano S, De Canale E, Vanuzzo MC,  
476 Besutti V, Saluzzo F, Onelia F, Pacenti M, Parisi SG, Carretta G, Donato D, Flor L, Cocchio S,  
477 Masi G, Sperduti A, Cattarino L, Salvador R, Nicoletti M, Caldart F, Castelli G, Nieddu E, Labella  
478 B, Fava L, Drigo M, Gaythorpe KAM, Brazzale AR, Toppo S, Trevisan M, Baldo V, Donnelly CA,  
479 Ferguson NM, Dorigatti I, Crisanti A. Suppression of a SARS-CoV-2 outbreak in the Italian  
480 municipality of Vo'. *Nature* 2020, 584:425-429. 10.1038/s41586-020-2488-1

- 481 12. Zou L, Ruan F, Huang M, Liang L, Huang H, Hong Z, Yu J, Kang M, Song Y, Xia J, Guo Q, Song  
482 T, He J, Yen HL, Peiris M, Wu J. SARS-CoV-2 Viral Load in Upper Respiratory Specimens of  
483 Infected Patients. *N Engl J Med* 2020, 382:1177-1179. 10.1056/NEJMc2001737
- 484 13. Lee S, Kim T, Lee E, Lee C, Kim H, Rhee H, Park SY, Son HJ, Yu S, Park JW, Choo EJ, Park S,  
485 Loeb M, Kim TH. Clinical Course and Molecular Viral Shedding Among Asymptomatic and  
486 Symptomatic Patients With SARS-CoV-2 Infection in a Community Treatment Center in the  
487 Republic of Korea. *JAMA Intern Med* 2020, 180:1-6. 10.1001/jamainternmed.2020.3862
- 488 14. Mina MJ, Parker R, Larremore DB. Rethinking Covid-19 Test Sensitivity - A Strategy for  
489 Containment. *N Engl J Med* 2020, 383:e120. 10.1056/NEJMp2025631
- 490 15. Rivers C, Silcox C, Potter C, Franklin M, Ray R, Gill M, McClellan M. Risk Assessment and  
491 Testing Protocols for Reducing SARS-CoV-2 Transmission in K-12 Schools. Duke Margolis  
492 Center for Health Policy 2020
- 493 16. Dibner KA, Schweingruber HA, Christakis DA. Reopening K-12 Schools During the COVID-19  
494 Pandemic: A Report From the National Academies of Sciences, Engineering, and Medicine.  
495 *JAMA* 2020, 324:833-834. 10.1001/jama.2020.14745
- 496 17. Notomi T, Okayama H, Masubuchi H, Yonekawa T, Watanabe K, Amino N, Hase T. Loop-  
497 mediated isothermal amplification of DNA. *Nucleic Acids Res* 2000, 28:E63.  
498 10.1093/nar/28.12.e63
- 499 18. Mahony J, Chong S, Bulir D, Ruyter A, Mwawasi K, Waltho D. Multiplex loop-mediated isothermal  
500 amplification (M-LAMP) assay for the detection of influenza A/H1, A/H3 and influenza B can  
501 provide a specimen-to-result diagnosis in 40 min with single genome copy sensitivity. *J Clin Virol*  
502 2013, 58:127-131. 10.1016/j.jcv.2013.06.006
- 503 19. McKenna JP, Cox C, Fairley DJ, Burke R, Shields MD, Watt A, Coyle PV. Loop-mediated  
504 isothermal amplification assay for rapid detection of *Streptococcus agalactiae* (group B  
505 streptococcus) in vaginal swabs - a proof of concept study. *J Med Microbiol* 2017, 66:294-300.  
506 10.1099/jmm.0.000437

- 507 20. Gonçalves DDS, Hooker DJ, Dong Y, Baran N, Kyrylos P, Iturbe-Ormaetxe I, Simmons CP,  
508 O'Neill SL. Detecting wMel Wolbachia in field-collected *Aedes aegypti* mosquitoes using loop-  
509 mediated isothermal amplification (LAMP). *Parasit Vectors* 2019, 12:404. 10.1186/s13071-019-  
510 3666-6 10.1186/s13071-019-3666-6
- 511 21. Romero Romero JL, Carver GD, Arce Johnson P, Perry KL, Thompson JR. A rapid, sensitive and  
512 inexpensive method for detection of grapevine red blotch virus without tissue extraction using  
513 loop-mediated isothermal amplification. *Arch Virol* 2019, 164:1453-1457. 10.1007/s00705-019-  
514 04207-y
- 515 22. Calvert AE, Biggerstaff BJ, Tanner NA, Lauterbach M, Lanciotti RS. Rapid colorimetric detection  
516 of Zika virus from serum and urine specimens by reverse transcription loop-mediated isothermal  
517 amplification (RT-LAMP). *PLoS One* 2017, 12:e0185340. 10.1371/journal.pone.0185340
- 518 23. Baek YH, Um J, Antigua KJC, Park JH, Kim Y, Oh S, Kim YI, Choi WS, Kim SG, Jeong JH, Chin  
519 BS, Nicolas HDG, Ahn JY, Shin KS, Choi YK, Park JS, Song MS. Development of a reverse  
520 transcription-loop-mediated isothermal amplification as a rapid early-detection method for novel  
521 SARS-CoV-2. *Emerg Microbes Infect* 2020, 9:998-1007. 10.1080/22221751.2020.1756698
- 522 24. Lamb LE, Bartolone SN, Ward E, Chancellor MB. Rapid detection of novel coronavirus/Severe  
523 Acute Respiratory Syndrome Coronavirus 2 (SARS-CoV-2) by reverse transcription-loop-  
524 mediated isothermal amplification. *PLoS One* 2020, 15:e0234682. 10.1371/journal.pone.0234682
- 525 25. Huang WE, Lim B, Hsu CC, Xiong D, Wu W, Yu Y, Jia H, Wang Y, Zeng Y, Ji M, Chang H, Zhang  
526 X, Wang H, Cui Z. RT-LAMP for rapid diagnosis of coronavirus SARS-CoV-2. *Microb Biotechnol*  
527 2020, 13:950-961. 10.1111/1751-7915.13586
- 528 26. Kitagawa Y, Orihara Y, Kawamura R, Imai K, Sakai J, Taramoto N, Matsuoka M, Takeuchi S,  
529 Maesaki S, Maeda T. Evaluation of rapid diagnosis of novel coronavirus disease (COVID-19)  
530 using loop-mediated isothermal amplification. *J Clin Virol* 2020, 129:104446.  
531 10.1016/j.jcv.2020.104446

- 532 27. Lu R, Wu X, Wan Z, Li Y, Jin X, Zhang C. A Novel Reverse Transcription Loop-Mediated  
533 Isothermal Amplification Method for Rapid Detection of SARS-CoV-2. *Int J Mol Sci* 2020,  
534 2110.3390/ijms21082826
- 535 28. Lu R, Wu X, Wan Z, Li Y, Zuo L, Qin J, Jin X, Zhang C. Development of a Novel Reverse  
536 Transcription Loop-Mediated Isothermal Amplification Method for Rapid Detection of SARS-CoV-  
537 2. *Viol Sin* 2020, 35:344-347. 10.1007/s12250-020-00218-1 10.1007/s12250-020-00218-1
- 538 29. Yan C, Cui J, Huang L, Du B, Chen L, Xue G, Li S, Zhang W, Zhao L, Sun Y, Yao H, Li N, Zhao  
539 H, Feng Y, Liu S, Zhang Q, Liu D, Yuan J. Rapid and visual detection of 2019 novel coronavirus  
540 (SARS-CoV-2) by a reverse transcription loop-mediated isothermal amplification assay. *Clin*  
541 *Microbiol Infect* 2020, 26:773-779. 10.1016/j.cmi.2020.04.001
- 542 30. Azzi L, Carcano G, Gianfagna F, Grossi P, Gasperina DD, Genoni A, Fasano M, Sessa F,  
543 Tettamanti L, Carinci F, Maurino V, Rossi A, Tagliabue A, Baj A. Saliva is a reliable tool to detect  
544 SARS-CoV-2. *J Infect* 2020, 81:e45-e50. 10.1016/j.jinf.2020.04.005
- 545 31. Nagura-Ikeda M, Imai K, Tabata S, Miyoshi K, Murahara N, Mizuno T, Horiuchi M, Kato K, Imoto  
546 Y, Iwata M, Mimura S, Ito T, Tamura K, Kato Y. Clinical Evaluation of Self-Collected Saliva by  
547 Quantitative Reverse Transcription-PCR (RT-qPCR), Direct RT-qPCR, Reverse Transcription-  
548 Loop-Mediated Isothermal Amplification, and a Rapid Antigen Test To Diagnose COVID-19. *J Clin*  
549 *Microbiol* 2020, 5810.1128/JCM.01438-20
- 550 32. Wyllie AL, Fournier J, Casanovas-Massana A, Campbell M, Tokuyama M, Vijayakumar P, Warren  
551 JL, Geng B, Muenker MC, Moore AJ, Vogels CBF, Petrone ME, Ott IM, Lu P, Venkataraman A,  
552 Lu-Culligan A, Klein J, Earnest R, Simonov M, Datta R, Handoko R, Naushad N, Sewanan LR,  
553 Valdez J, White EB, Lapidus S, Kalinich CC, Jiang X, Kim DJ, Kudo E, Linehan M, Mao T,  
554 Moriyama M, Oh JE, Park A, Silva J, Song E, Takahashi T, Taura M, Weizman OE, Wong P,  
555 Yang Y, Bermejo S, Odio CD, Omer SB, Dela Cruz CS, Farhadian S, Martinello RA, Iwasaki A,  
556 Grubaugh ND, Ko AI. Saliva or Nasopharyngeal Swab Specimens for Detection of SARS-CoV-2.  
557 *N Engl J Med* 2020, 383:1283-1286. 10.1056/NEJMc2016359

- 558 33. To KK, Tsang OT, Yip CC, Chan KH, Wu TC, Chan JM, Leung WS, Chik TS, Choi CY, Kandamby  
559 DH, Lung DC, Tam AR, Poon RW, Fung AY, Hung IF, Cheng VC, Chan JF, Yuen KY. Consistent  
560 Detection of 2019 Novel Coronavirus in Saliva. *Clin Infect Dis* 2020, 71:841-843.  
561 10.1093/cid/ciaa149
- 562 34. Yokota I, Shane PY, Okada K, Unoki Y, Yang Y, Inao T, Sakamaki K, Iwasaki S, Hayasaka K,  
563 Sugita J, Nishida M, Fujisawa S, Teshima T. Mass screening of asymptomatic persons for SARS-  
564 CoV-2 using saliva. *Clin Infect Dis* 2020, 10.1093/cid/ciaa1388
- 565 35. Dudley DM, Newman CM, Weiler AM, Ramuta MD, Shortreed CG, Heffron AS, Accola MA,  
566 Rehrauer WM, Friedrich TC, O'Connor DH. Optimizing direct RT-LAMP to detect transmissible  
567 SARS-CoV-2 from primary nasopharyngeal swab samples. *PLoS One* 2020, 15:e0244882.  
568 10.1371/journal.pone.0244882
- 569 36. Ott IM, Strine MS, Watkins AE, Boot M, Kalinich CC, Harden CA, Vogels CBF, Casanovas-  
570 Massana A, Moore AJ, Muenker MC, Nakahata M, Tokuyama M, Nelson A, Fournier J, Bermejo  
571 S, Campbell M, Datta R, Dela Cruz CS, Farhadian SF, Ko AI, Iwasaki A, Grubaugh ND, Wilen CB,  
572 Wyllie AL. Simply saliva: stability of SARS-CoV-2 detection negates the need for expensive  
573 collection devices. *medRxiv* 2020, 10.1101/2020.08.03.20165233
- 574 37. Kim YI, Casel MAB, Kim SM, Kim SG, Park SJ, Kim EH, Jeong HW, Poo H, Choi YK.  
575 Development of severe acute respiratory syndrome coronavirus 2 (SARS-CoV-2) thermal  
576 inactivation method with preservation of diagnostic sensitivity. *J Microbiol* 2020, 58:886-891.  
577 10.1007/s12275-020-0335-6 10.1007/s12275-020-0335-6
- 578 38. Lalli MA, Langmade SJ, Chen X, Fronick CC, Sawyer CS, Burcea LC, Wilkinson MN, Fulton RS,  
579 Heinz M, Buchser WJ, Head RD, Mitra RD, Milbrandt J. Rapid and extraction-free detection of  
580 SARS-CoV-2 from saliva with colorimetric LAMP. *medRxiv* 2020, 10.1101/2020.05.07.20093542
- 581 39. Broughton JP, Deng X, Yu G, Fasching CL, Servellita V, Singh J, Miao X, Streithorst JA,  
582 Granados A, Sotomayor-Gonzalez A, Zorn K, Gopez A, Hsu E, Gu W, Miller S, Pan CY, Guevara  
583 H, Wadford DA, Chen JS, Chiu CY. CRISPR-Cas12-based detection of SARS-CoV-2. *Nat*  
584 *Biotechnol* 2020, 38:870-874. 10.1038/s41587-020-0513-4

- 585 40. Color Genomics. SARS-CoV-2 LAMP Diagnostic Assay. 2020. [https://www.color.com/wp-](https://www.color.com/wp-content/uploads/2020/05/LAMP-Diagnostic-Assay.pdf)  
586 [content/uploads/2020/05/LAMP-Diagnostic-Assay.pdf](https://www.color.com/wp-content/uploads/2020/05/LAMP-Diagnostic-Assay.pdf).
- 587 41. Humphrey SP, Williamson RT. A review of saliva: normal composition, flow, and function. *J*  
588 *Prosthet Dent* 2001, 85:162-169. 10.1067/mpr.2001.113778
- 589 42. Tanaka M, Masuda M. Concentration and individual variation of inorganic ions in unstimulated  
590 whole saliva. *Kokubyo Gakkai Zasshi* 2000, 67:46-51. 10.5357/koubyou.67.46
- 591 43. Varga G. Physiology of the salivary glands. *Surgery (Oxford)* 2012, 30:578-583.  
592 <https://doi.org/10.1016/j.mpsur.2012.09.010>
- 593 44. Public Health Madison and Dane County. Weekly COVID-19 Core Data by Date. 2021.  
594 <https://www.publichealthmdc.com/coronavirus/forward-dane/data>.
- 595 45. University of Wisconsin-Madison. COVID-19 Response Dashboard 2020. 2021.  
596 <https://covidresponse.wisc.edu/dashboard-2020/>.
- 597 46. Howson ELA, Kidd SP, Armson B, Goring A, Sawyer J, Cassar C, Cross D, Lewis T, Hockey J,  
598 Rivers S, Cawthraw S, Banyard A, Anderson P, Rahou S, Andreou M, Morant N, Clark D, Walsh  
599 C, Laxman S, Houghton R, Slater-Jefferies J, Costello P, Brown I, Cortes N, Godfrey KM, Fowler  
600 VL. Preliminary optimisation of a simplified sample preparation method to permit direct detection  
601 of SARS-CoV-2 within saliva samples using reverse-transcription loop-mediated isothermal  
602 amplification (RT-LAMP). *J Virol Methods* 2021, 289:114048. 10.1016/j.jviromet.2020.114048
- 603 47. Janíková M, Hodosy J, Boor P, Klempa B, Celec P. Loop-mediated isothermal amplification for  
604 the detection of SARS-CoV-2 in saliva. *Microb Biotechnol* 2021, 14:307-316. 10.1111/1751-  
605 7915.13737
- 606 48. Diaz L, Johnson BE, Jenkins DM. Real-time optical analysis of a colorimetric LAMP assay for  
607 SARS-CoV-2 in saliva with a handheld instrument improves accuracy compared to endpoint  
608 assessment. *medRxiv* 2021, <https://doi.org/10.1101/2021.01.13.21249412>
- 609 49. Brown TA, Schaefer KS, Tsang A, Yi HA, Grimm JB, Lemire AL, Jradi FM, Kim C, McGowan K,  
610 Ritola K. Direct detection of SARS-CoV-2 RNA using high-contrast pH-sensitive dyes. *medRxiv*  
611 2021, 2020.12. 26.20248878. <https://doi.org/10.1101/2020.12.26.20248878>

- 612 50. Yang Q, Meyerson NR, Clark SK, Paige CL, Fattor WT, Gilchrist AR, Barbachano-Guerrero A,  
613 Healy BG, Worden-Sapper ER, Wu SS. Saliva TwoStep for rapid detection of asymptomatic  
614 SARS-CoV-2 carriers. medRxiv 2021, 2020.07. 16.20150250.  
615 <https://doi.org/10.1101/2020.07.16.20150250>
- 616 51. US Food and Drug Administration. COVID-19 Update: FDA Authorizes First Diagnostic Test  
617 Where Results Can Be Read Directly From Testing Card. 2020. [https://www.fda.gov/news-](https://www.fda.gov/news-events/press-announcements/covid-19-update-fda-authorizes-first-diagnostic-test-where-results-can-be-read-directly-testing-card)  
618 [events/press-announcements/covid-19-update-fda-authorizes-first-diagnostic-test-where-results-](https://www.fda.gov/news-events/press-announcements/covid-19-update-fda-authorizes-first-diagnostic-test-where-results-can-be-read-directly-testing-card)  
619 [can-be-read-directly-testing-card](https://www.fda.gov/news-events/press-announcements/covid-19-update-fda-authorizes-first-diagnostic-test-where-results-can-be-read-directly-testing-card).
- 620 52. Pilarowski G, Lebel P, Sunshine S, Liu J, Crawford E, Marquez C, Rubio L, Chamie G, Martinez J,  
621 Peng J, Black D, Wu W, Pak J, Laurie MT, Jones D, Miller S, Jacobo J, Rojas S, Rojas S,  
622 Nakamura R, Tulier-Laiwa V, Petersen M, Havlir DV, DeRisi J. Performance characteristics of a  
623 rapid SARS-CoV-2 antigen detection assay at a public plaza testing site in San Francisco. J Infect  
624 Dis 2021, 10.1093/infdis/jiaa802
- 625 53. Prince-Guerra JL, Almendares O, Nolen LD, Gunn JKL, Dale AP, Buono SA, Deutsch-Feldman  
626 M, Suppiah S, Hao L, Zeng Y, Stevens VA, Knipe K, Pompey J, Atherstone C, Bui DP, Powell T,  
627 Tamin A, Harcourt JL, Shewmaker PL, Medrzycki M, Wong P, Jain S, Tejada-Strop A, Rogers S,  
628 Emery B, Wang H, Petway M, Bohannon C, Folster JM, MacNeil A, Salerno R, Kuhnert-Tallman  
629 W, Tate JE, Thornburg NJ, Kirking HL, Sheiban K, Kudrna J, Cullen T, Komatsu KK, Villanueva  
630 JM, Rose DA, Neatherlin JC, Anderson M, Rota PA, Honein MA, Bower WA. Evaluation of Abbott  
631 BinaxNOW Rapid Antigen Test for SARS-CoV-2 Infection at Two Community-Based Testing Sites  
632 - Pima County, Arizona, November 3-17, 2020. MMWR Morb Mortal Wkly Rep 2021, 70:100-105.  
633 [10.15585/mmwr.mm7003e3](https://doi.org/10.15585/mmwr.mm7003e3)
- 634 54. Pray IW, Ford L, Cole D, Lee C, Bigouette JP, Abedi GR, Bushman D, Delahoy MJ, Currie D,  
635 Cherney B, Kirby M, Fajardo G, Caudill M, Langolf K, Kahrs J, Kelly P, Pitts C, Lim A, Aulik N,  
636 Tamin A, Harcourt JL, Queen K, Zhang J, Whitaker B, Browne H, Medrzycki M, Shewmaker P,  
637 Folster J, Bankamp B, Bowen MD, Thornburg NJ, Goffard K, Limbago B, Bateman A, Tate JE,  
638 Gieryn D, Kirking HL, Westergaard R, Killerby M. Performance of an Antigen-Based Test for



- 639 Asymptomatic and Symptomatic SARS-CoV-2 Testing at Two University Campuses - Wisconsin,  
640 September-October 2020. MMWR Morb Mortal Wkly Rep 2021, 69:1642-1647.  
641 10.15585/mmwr.mm695152a3
- 642 55. US Food and Drug Administration. BinaxNOW COVID-19 Ag Card. 2020.  
643 <https://www.fda.gov/media/141570/download>.
- 644 56. Alekseenko A, Barrett D, Pareja-Sanchez Y, Howard RJ, Strandback E, Ampah-Korsah H,  
645 Rovšnik U, Zuniga-Veliz S, Klenov A, Malloo J, Ye S, Liu X, Reinius B, Elsässer SJ, Nyman T,  
646 Sandh G, Yin X, Pelechano V. Direct detection of SARS-CoV-2 using non-commercial RT-LAMP  
647 reagents on heat-inactivated samples. Sci Rep 2021, 11:1820. 10.1038/s41598-020-80352-8  
648 10.1038/s41598-020-80352-8
- 649 57. Simon S. How A Chicago Dad Developed A Coronavirus Testing Program For His Son's School.  
650 National Public Radio. 2020. [https://www.npr.org/2020/09/26/917185895/how-a-chicago-dad-](https://www.npr.org/2020/09/26/917185895/how-a-chicago-dad-developed-a-coronavirus-testing-program-for-his-sons-school)  
651 [developed-a-coronavirus-testing-program-for-his-sons-school](https://www.npr.org/2020/09/26/917185895/how-a-chicago-dad-developed-a-coronavirus-testing-program-for-his-sons-school).
- 652 58. Chappell K. Coronavirus Saliva Screening Program Expands at Suburban Schools. NBC Chicago,  
653 2020. [https://www.nbcchicago.com/news/local/coronavirus-saliva-screening-program-expands-at-](https://www.nbcchicago.com/news/local/coronavirus-saliva-screening-program-expands-at-suburban-schools/2374812/)  
654 [suburban-schools/2374812/](https://www.nbcchicago.com/news/local/coronavirus-saliva-screening-program-expands-at-suburban-schools/2374812/)
- 655 59. Lee EC, Wada NI, Grabowski MK, Gurley ES, Lessler J. The engines of SARS-CoV-2 spread.  
656 Science 2020, 370:406-407. 10.1126/science.abd8755
- 657 60. Ryan S. 5 Big Ten football takeaways after Week 6, including the messy league rules of playing  
658 during COVID-19 and who has a shot at the championship. Chicago Tribune, 2020.  
659 [https://www.chicagotribune.com/sports/college/ct-cb-big-ten-takeaways-ohio-state-covid-19-](https://www.chicagotribune.com/sports/college/ct-cb-big-ten-takeaways-ohio-state-covid-19-20201130-zjxnilmujhtrop53ytthg7i7i-story.html)  
660 [20201130-zjxnilmujhtrop53ytthg7i7i-story.html](https://www.chicagotribune.com/sports/college/ct-cb-big-ten-takeaways-ohio-state-covid-19-20201130-zjxnilmujhtrop53ytthg7i7i-story.html)
- 661 61. Kissler SM, Fauver JR, Mack C, Tai C, Shiue KY, Kalinich CC, Jednak S, Ott IM, Vogels CBF,  
662 Wohlgemuth J. Viral dynamics of SARS-CoV-2 infection and the predictive value of repeat testing.  
663 medRxiv 2020, <https://doi.org/10.1101/2020.10.21.20217042>

664 62. Buchanan L, Gamio L, Leatherby L, Stein R, Triebert C. Inside the White House Event Now Under  
665 Covid-19 Scrutiny. The New York Times, 2020.  
666 <https://www.nytimes.com/interactive/2020/10/03/us/rose-garden-event-covid.html>

667

668

669

670

671

672

673

#### 674 **Figure legends**

675

676 **Figure 1: Point-of-care RT-LAMP SARS-CoV-2 testing workflow. Steps 1-5.** Saliva sample  
677 preparation. **Steps 6-7.** RT-LAMP reagent preparation. **Steps 8-10.** RT-LAMP reactions and results  
678 interpretation. A reaction color change from pink/orange to yellow after 30 minutes in at least 1 of 2  
679 sample replicates was scored as positive. Figure was created using BioRender.com.

680

681 **Figure 2: Detection of SARS-CoV-2 in contrived saliva samples by direct RT-LAMP. A.** Initial limit  
682 of detection (LOD) assessment with contrived saliva samples from 3 volunteers (S1, S2, S3). RT-LAMP  
683 reactions determined to be negative are pink and those determined to be positive are yellow.  
684 Quantitative RT-PCR vRNA loads are presented as copies/ $\mu$ l above the replicates for each sample. **B.**  
685 Bar graph showing an expanded assessment of RT-LAMP LOD for 22 additional contrived saliva  
686 samples (S4-S25). Gamma-irradiated SARS-CoV-2 (irSARS-CoV-2) vRNA load is shown as copies/ $\mu$ l  
687 on the x-axis, number of samples positive in 2 (black), 1 (dark gray), or 0 (light gray) replicates is shown  
688 on the y-axis.

689

690 **Figure 3: Detection of SARS-CoV-2 in 38 clinical saliva specimens by direct RT-LAMP.** The vRNA  
691 load of each clinical sample is plotted on the x-axis relative to the in-house CDC N1 qRT-PCR assay  
692 cycle threshold (Ct) on the y-axis. Black, dark gray, and light gray indicate 2, 1, and 0 positive replicates  
693 respectively.

694

695

696

697

698

699

700

701

702 Table 1. RT-LAMP N-gene primers

| Primer                      | Sequence 5'->3'                           | Concentration |
|-----------------------------|-------------------------------------------|---------------|
| Outer forward primer (F3)   | AACACAAGCTTTTCGGCAG                       | 0.2uM         |
| Outer backward primer (B3)  | GAAATTTGGATCTTTGTCATCC                    | 0.2uM         |
| Forward inner primer (FIP)  | TGCGGCCAATGTTTGTAAATCAGCCAAGGAAATTTGGGGAC | 1.6uM         |
| Backward inner primer (BIP) | CGCATTGGCATGGAAGTCACTTTGATGGCACCTGTGTAG   | 1.6uM         |
| Loop forward primer (LF)    | TTCCTTGTCTGATTAGTTC                       | 0.8uM         |
| Loop backward primer (LB)   | ACCTTCGGGAACGTGGTT                        | 0.8uM         |

Table 2. RT-LAMP evaluation of SARS-CoV-2 positive clinical saliva samples.

| Sample | Ct (N1 assay) | Positive by RT-LAMP | vRNA load (copies/ $\mu$ l) | Sample | Ct (N1 assay) | Positive by RT-LAMP | vRNA load (copies/ $\mu$ l) |
|--------|---------------|---------------------|-----------------------------|--------|---------------|---------------------|-----------------------------|
| UWHC1  | 27.65         | 0/2                 | $3.25 \times 10^2$          | UWHC20 | 25.80         | 2/2                 | $9.48 \times 10^2$          |
| UWHC2  | 32.7          | 0/2                 | 10.9                        | UWHC21 | 20.18         | 2/2                 | $4.40 \times 10^4$          |
| UWHC3  | 20.98         | 2/2                 | $5.17 \times 10^4$          | UWHC22 | 28.92         | 0/2                 | $1.13 \times 10^2$          |
| UWHC4  | 24.07         | 2/2                 | $3.57 \times 10^3$          | UWHC23 | 21.26         | 2/2                 | $2.10 \times 10^4$          |
| UWHC5  | 26.53         | 2/2                 | $6.81 \times 10^2$          | UWHC24 | 29.92         | 0/2                 | 57.2                        |
| UWHC6  | 30.85         | 1/2                 | 37.4                        | UWHC25 | 36.71         | 0/2                 | 0.796*                      |
| UWHC7  | 36.96         | 0/2                 | 0.701                       | UWHC26 | 25.96         | 2/2                 | $1.31 \times 10^2$          |
| UWHC8  | 26.28         | 1/2                 | $8.10 \times 10^2$          | UWHC27 | 29.99         | 0/2                 | 54.1                        |
| UWHC9  | 37.59         | 0/2                 | 0.402                       | UWHC28 | 24.34         | 2/2                 | $2.58 \times 10^3$          |
| UWHC10 | 24.01         | 2/2                 | $3.72 \times 10^3$          | UWHC29 | 20.55         | 2/2                 | $4.72 \times 10^4$          |
| UWHC11 | 22.39         | 2/2                 | $1.10 \times 10^4$          | UWHC30 | 33.18         | 0/2                 | 7.89                        |
| UWHC12 | 35.46         | 0/2                 | 1.75                        | UWHC31 | 22.87         | 2/2                 | $9.57 \times 10^3$          |
| UWHC13 | 36.09         | 0/2                 | 1.14                        | UWHC32 | 23.07         | 2/2                 | $8.33 \times 10^3$          |
| UWHC14 | 23.11         | 2/2                 | $5.96 \times 10^3$          | UWHC33 | 26.85         | 2/2                 | $6.20 \times 10^2$          |
| UWHC15 | 23.38         | 2/2                 | $4.95 \times 10^3$          | UWHC34 | 20.33         | 0/2                 | $5.49 \times 10^4$          |
| UWHC16 | 33.86         | 0/2                 | 3.99                        | UWHC35 | 23            | 2/2                 | $8.88 \times 10^3$          |
| UWHC17 | n/a           | 0/2                 | 0                           | UWHC36 | 32.26         | 0/2                 | 14.9*                       |
| UWHC18 | 23.02         | 2/2                 | $6.34 \times 10^3$          | UWHC37 | 33.94         | 0/2                 | 4.33                        |
| UWHC19 | 37.31         | 0/2                 | 0.612                       | UWHC38 | 25.96         | 2/2                 | $1.74 \times 10^3$          |

\*Sample only positive in one qRT-PCR replicate.

Table 3. RT-LAMP results for 10- and 100-fold dilutions of 13 SARS-CoV-2-positive samples from UWHC.

| Sample | 1:10 dilution result | 1:100 dilution result | Undiluted vRNA load (copies/ $\mu$ l) |
|--------|----------------------|-----------------------|---------------------------------------|
| UWHC1  | 1/2                  | 0/2                   | $3.25 \times 10^2$                    |
| UWHC2  | 0/2                  | 0/2                   | 10.9                                  |
| UWHC3  | 2/2                  | 2/2                   | $5.17 \times 10^4$                    |
| UWHC4  | 2/2                  | 2/2                   | $3.57 \times 10^3$                    |
| UWHC5  | 1/2                  | 0/2                   | $6.81 \times 10^2$                    |
| UWHC6  | 0/2                  | 0/2                   | 37.4                                  |
| UWHC7  | 0/2                  | 0/2                   | 0.701                                 |
| UWHC8  | 1/2                  | 0/2                   | $8.10 \times 10^2$                    |
| UWHC9  | 0/2                  | 0/2                   | 0.402                                 |
| UWHC10 | 2/2                  | 0/2                   | $3.72 \times 10^3$                    |
| UWHC11 | 2/2                  | 1/2                   | $1.10 \times 10^4$                    |
| UWHC12 | 0/2                  | 0/2                   | 1.75                                  |
| UWHC13 | 0/2                  | 0/2                   | 1.14                                  |

Table 4. Samples identified as potentially positive for SARS-CoV-2 by RT-LAMP during point-of-need testing.

| RT-LAMP-positive sample | qRT-PCR viral load copies/ $\mu$ l |
|-------------------------|------------------------------------|
| POC1                    | 8.53                               |
| POC2                    | $2.15 \times 10^4$                 |
| POC3                    | neg                                |
| POC4                    | neg                                |
| POC5                    | neg                                |
| POC6                    | neg                                |
| POC7                    | $3.62 \times 10^5$                 |
| POC8                    | neg                                |
| POC9                    | n/a*                               |
| POC10                   | $2.12 \times 10^3$                 |
| POC11                   | neg                                |
| POC12                   | $1.04 \times 10^3$                 |
| POC13                   | $2.06 \times 10^2$                 |
| POC14                   | neg                                |
| POC15                   | 52.8                               |
| POC16                   | $6.02 \times 10^2$                 |
| POC17                   | 87.3                               |
| POC18                   | $1.17 \times 10^3$                 |
| POC19                   | neg                                |
| POC20                   | $1.38 \times 10^2$                 |
| POC21                   | $4.07 \times 10^2$                 |

\*Volunteer did not consent to follow-up testing.

## Saliva preparation

1

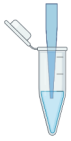

Collect saliva in a 1.5 ml tube using 1000 µl pipette tip

2

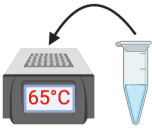

Heat the saliva in heat block at 65°C for 30 minutes

3

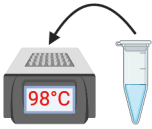

Heat the saliva in heat block at 98°C for 3 minutes

4

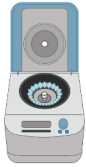

Spin down tubes for 2 minutes in a microcentrifuge

5

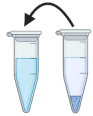

Add 50 µl of saliva into 1.5 ml tube with 50 µl PBS

## RT-LAMP reagent preparation

6

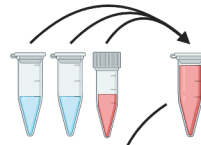

Combine 10x primer stock, dH2O, and 2x WarmStart master mix

7

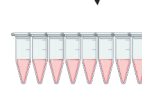

Aliquot 17 µl of the mix into PCR strip tubes

## RT-LAMP reaction

8

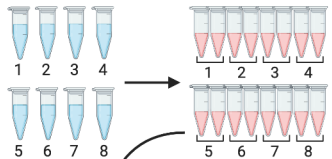

Add 3 µl of diluted saliva into 17 µl of RT-LAMP mix in duplicate

9

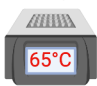

Mix, spin down, and incubate in heat block at 65°C for 30 minutes

10

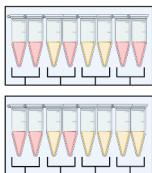

Read results:  
pink = negative (-)  
yellow = positive (+)

## Results interpretation

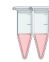

negative (pink/pink)

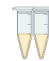

positive (yellow/yellow)

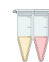

positive (yellow/pink)

*\* all controls must be correct, otherwise test is invalid*

**A**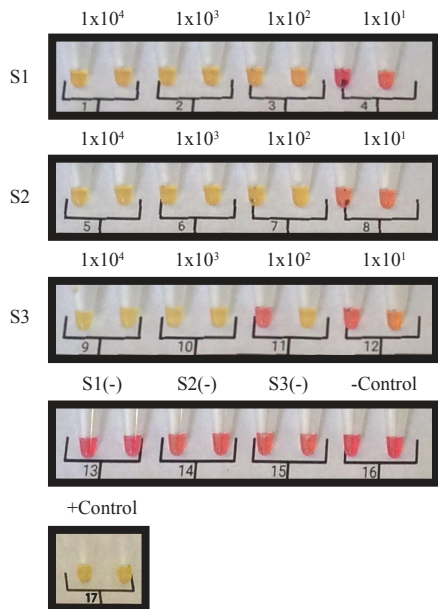**B**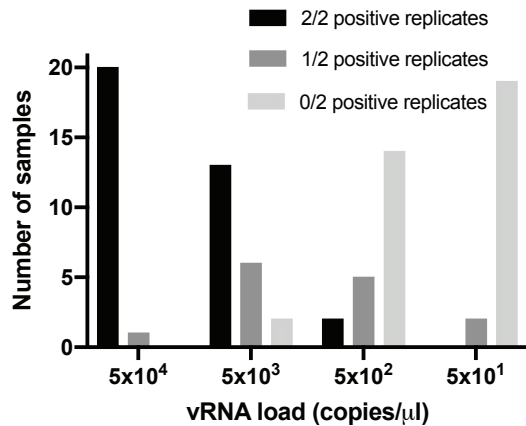



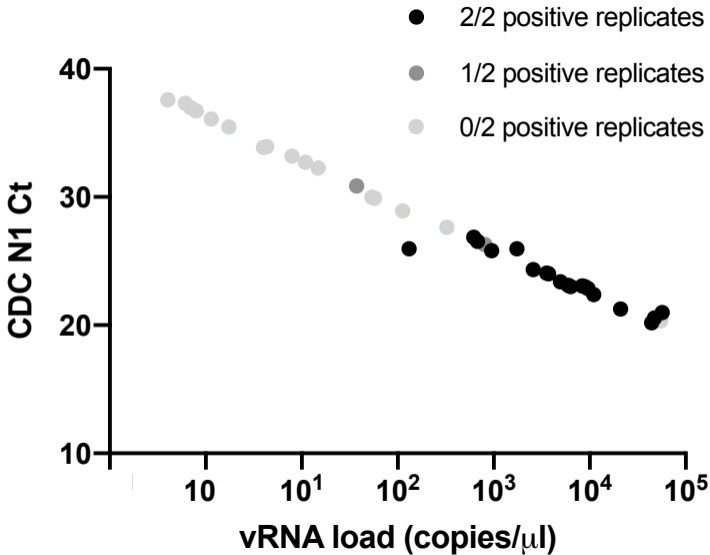

Source: http://medrxiv.org/content/10.1101/2020.07.28.20164038v3.full.pdf
